# Supplementary material for: Clonal hematopoiesis in patients with stem cell mobilization failure: a nested case-control study
Source: PubMed Central journal article supplement — Blood Adv. 2022 Oct 14;7(7):1269–78. doi: 10.1182/bloodadvances.2022007497 (PMC10119633; doi:10.1182/bloodadvances.2022007497), 2022-10-14

## **Supplementary Appendix**

### **Clonal hematopoiesis in patients with stem cell mobilization failure: a nested case-control study**

Carin L.E. Hazenberg, Aniek O. de Graaf, René Mulder, Laura B. Bungener, Maaïke G.J.M. van Bergen, André B. Mulder, Goda Choi, Jan Jacob Schuringa, Marco R. de Groot, Edo Vellenga, Joop H. Jansen, Gerwin A. Huls and Isabelle A. van Zeventer

|                                   |          |
|-----------------------------------|----------|
| <b>Supplementary Methods.....</b> | <b>2</b> |
| <b>Supplementary Tables.....</b>  | <b>3</b> |
| <b>Supplementary Figures.....</b> | <b>7</b> |

## Supplementary Methods

### ***Histological subtypes***

Histological subtypes were registered according to the WHO classification of 2008 or 2016. For analysis purposes, we defined general groups for lymphoma subtypes. Diffuse large B-cell lymphoma (DLBCL) or associated variants, transformed low-grade B-cell lymphoma, Burkitt lymphoma, high-grade B-cell lymphoma with rearrangement of MYC and BCL2 and/or BCL6 (previous double or triple hit DLBCL) and high-grade B-cell lymphoma with features between DLBCL and Burkitt lymphoma were summarized as high grade large B-cell lymphoma. Follicular lymphoma, mantle cell lymphoma, Hodgkin lymphoma and NK/T or T-cell lymphoma were classified separately. We included multiple myeloma, AL-amyloidosis, POEMS, extraosseous plasmacytoma and plasma cell leukemia in a subgroup of plasma cell dyscrasias. In case of transformation or more than one histological subtype (mixed or more than one diagnosis) of lymphoma, the histological subtype before mobilization was recorded.

### ***R packages for analysis and visualization***

Cox proportional hazards and competing risk regression analyses as well as visualization of survival were performed using R packages *survminer* (<https://cran.r-project.org/web/packages/survminer/index.html>), *survival* (<http://cran.r-project.org/web/packages/survival/index.html>), *cmprsk* (<http://cran.r-project.org/web/packages/cmprsk/index.html>) and *riskRegression* (<https://cran.r-project.org/web/packages/riskRegression/index.html>). The R package *compareGroups* (<https://github.com/isubirana/compareGroups>) was used for construction of tables with characteristics. All remaining figures were generated using *ggplot2* (<https://github.com/tidyverse/ggplot2>) and merged by *cowplot* (<https://github.com/wilkelab/cowplot>). For data manipulation and processing, we used *tidyr* (<https://github.com/tidyverse/tidyr>), *dplyr* (<https://github.com/tidyverse/dplyr>) and *reshape2* (<https://github.com/cran/reshape2>).

**Supplementary Table 1. Overview of genes and regions in the sequencing panel.**

| Gene            | Reference transcript | ENSEMBL reference transcript | Exon                          | Targeted codons/region     |
|-----------------|----------------------|------------------------------|-------------------------------|----------------------------|
| <b>ASXL1</b>    | NM_015338            | ENST00000375687              | 13 (partially)                | exon 13                    |
| <b>BRAF</b>     | NM_004333.4          | ENST00000288602              | 15 (partially)                | codon 600                  |
| <b>CALR</b>     | NM_004343            | ENST00000316448              | 9                             | exon 9                     |
| <b>CBL</b>      | NM_005188            | ENST00000264033              | 8-9                           | exon 8 and 9               |
| <b>CSF3R</b>    | NM_156039            | ENST00000373103              | 14, 17                        | codon 618, 615 and exon 17 |
| <b>DNMT3A</b>   | NM_175629            | ENST00000264709              | 2-23 (all coding exons)       | all coding exons           |
| <b>ETNK1</b>    | NM_018638            | ENST00000266517              | 3 (partially)                 | codon 243-244              |
| <b>EZH2</b>     | NM_004456            | ENST00000320356              | 2-20 (all coding exons)       | all coding exons           |
| <b>FLT3_835</b> | NM_004119            | ENST00000241453              | 20 (partially)                | codon 835-842              |
| <b>IDH1</b>     | NM_005896            | ENST00000415913              | 4 (partially)                 | codon 132                  |
| <b>IDH2</b>     | NM_002168            | ENST00000330062              | 4 (partially)                 | codon 140, 172             |
| <b>JAK2</b>     | NM_004972            | ENST00000381652              | 12, 14 (partially)            | codon 617 and exon 12      |
| <b>KIT</b>      | NM_000222            | ENST00000288135              | 8 (partially), 17 (partially) | codon 816, 419             |
| <b>KRAS</b>     | NM_004985            | ENST00000256078              | 2-3 (partially)               | a.o. codon 12, 13, 61      |
| <b>MPL</b>      | NM_005373            | ENST00000372470              | 10 (partially)                | codon 515, 505             |
| <b>MYD88</b>    | NM_002468.4          | ENST00000417037              | 4-5 (partially)               | codon 265 and 232          |
| <b>NOTCH1</b>   | NM_017617.4          | ENST00000277541              | 34 (partially)                | codon 2514                 |
| <b>NPM1</b>     | NM_002520            | ENST00000517671              | 11 (partially)                | codon 288-290              |
| <b>NRAS</b>     | NM_002524            | ENST00000369535              | 2-3 (partially)               | a.o. codon 12, 13, 61      |
| <b>RUNX1</b>    | NM_001754            | ENST00000437180              | 2-9 (all coding exons)        | all coding exons           |
| <b>SETBP1</b>   | NM_015559            | ENST00000282030              | 4 (partially)                 | codon 850-910              |
| <b>SF3B1</b>    | NM_012433            | ENST00000335508              | 13-16                         | codon 575-790              |
| <b>SRSF2</b>    | NM_003016            | ENST00000392485              | 1 (partially)                 | codon 95, 96               |
| <b>TET2</b>     | NM_001127208         | ENST00000380013              | 3-11 (all coding exons)       | all coding exons           |
| <b>TP53</b>     | NM_000546            | ENST00000269305              | 2-11 (all coding exons)       | all coding exons           |
| <b>U2AF1</b>    | NM_006758            | ENST00000291552              | 2, 6 (partially)              | codon 34, 157              |
| <b>WT1</b>      | NM_024426            | ENST00000332351              | 7, 9                          | exon 7 and 9               |
| <b>PPM1D</b>    | NM_003620            | ENST00000305921              | 6                             | exon 6                     |

**Supplementary Table 2. Mutations indicative of clonal hematopoiesis detected in poor mobilizers and controls.**

|               | Poor mobilizers |               | Controls   |               |
|---------------|-----------------|---------------|------------|---------------|
|               | # variants      | # individuals | # variants | # individuals |
| <b>DNMT3A</b> | 19              | 11            | 19         | 15            |
| <b>PPM1D</b>  | 12              | 11            | 1          | 1             |
| <b>TET2</b>   | 7               | 7             | 3          | 3             |
| <b>TP53</b>   | 7               | 5             | 0          | 0             |
| <b>ASXL1</b>  | 2               | 2             | 0          | 0             |
| <b>JAK2</b>   | 0               | 0             | 2          | 2             |
| <b>RUNX1</b>  | 0               | 0             | 2          | 2             |
| <b>U2AF1</b>  | 1               | 1             | 0          | 0             |
| <b>SF3B1</b>  | 1               | 1             | 0          | 0             |
| <b>ETNK1</b>  | 0               | 0             | 1          | 1             |
| <b>EZH2</b>   | 1               | 1             | 1          | 1             |

**Supplementary Table 3. TP53 and PPM1D mutations detected in poor mobilizers.**

| ID | Gene  | c.HGVS         | VAF (%) | Sex | Age | CD34<br>yield* | Apheresis<br>days | Mobilisation<br>failure |
|----|-------|----------------|---------|-----|-----|----------------|-------------------|-------------------------|
| 1  | TP53  | 659A>G         | 4.9     | M   | 60+ | <2             | 1                 | Group 1                 |
|    | TP53  | 817C>T         | 5.9     |     |     |                |                   |                         |
|    | PPM1D | 1535del        | 3.9     |     |     |                |                   |                         |
| 2  | TP53  | 842A>G         | 1.8     | M   | 60+ | ≥2             | 3                 | Group 3                 |
| 3  | TP53  | 524G>A         | 2.9     | M   | 60+ | ≥2             | 2                 | Group 3                 |
| 4  | TP53  | 749C>T         | 1.6     | M   | 60+ | ≥2             | 2                 | Group 3                 |
| 5  | TP53  | 715A>G         | 29      | M   | <60 | NA             | 0                 | Group 2                 |
|    | TP53  | 723del         | 1       |     |     |                |                   |                         |
| 6  | PPM1D | 1423G>T        | 1.7     | M   | <60 | ≥2             | 1                 | Group 3                 |
|    | PPM1D | 1612_1613dup   | 15      |     |     |                |                   |                         |
| 7  | PPM1D | c.1469_1476del | 1.7     | F   | <60 | ≥2             | 2                 | Group 3                 |
| 8  | PPM1D | c.1535del      | 1.3     | M   | <60 | ≥2             | 2                 | Group 3                 |
| 9  | PPM1D | c.1602del      | 1.2     | M   | <60 | NA             | 0                 | Group 2                 |
| 10 | PPM1D | c.1535del      | 1.4     | M   | 60+ | <2             | 1                 | Group 1                 |
| 11 | PPM1D | c.1321C>A      | 1.3     | M   | 60+ | ≥2             | 2                 | Group 3                 |
| 12 | PPM1D | c.1388del      | 2.6     | F   | 60+ | ≥2             | 3                 | Group 3                 |
| 13 | PPM1D | c.1270_1273dup | 1.1     | M   | <60 | ≥2             | 3                 | Group 3                 |
| 14 | PPM1D | c.1726_1727del | 1.6     | F   | <60 | ≥2             | 2                 | Group 3                 |
| 15 | PPM1D | c.1469T>A      | 1.5     | M   | 60+ | NA             | 0                 | Group 2                 |

NA, apheresis was not initiated; VAF, variant allele frequency. \*Number of CD34+ cells collected (x10<sup>9</sup>/kg).

**Supplementary Table 4. Characteristics of TP53 and PPM1D mutant patients.**

|                                                         | Absence of clonal<br>hematopoiesis<br>n=131 | TP53 or PPM1D<br>mutant<br>n=16 | Other mutational<br>spectra<br>n=32 | P-value | N   |
|---------------------------------------------------------|---------------------------------------------|---------------------------------|-------------------------------------|---------|-----|
| <b>Male sex - n (%)</b>                                 | 97 (74.0%)                                  | 12 (75.0%)                      | 20 (62.5%)                          | 0.429   | 179 |
| <b>Age at apheresis (years) – median [IQR]</b>          | 59.0 [50.0;63.0]                            | 60.5 [55.0;64.2]                | 60.0 [53.0;64.0]                    | 0.320   | 179 |
| <b>Major histological subtype - n (%)</b>               |                                             |                                 |                                     |         | 179 |
| Aggressive B-cell lymphoma                              | 22 (16.8%)                                  | 8 (50.0%)                       | 10 (31.2%)                          |         |     |
| Follicular lymphoma                                     | 5 (3.82%)                                   | 1 (6.25%)                       | 2 (6.25%)                           |         |     |
| Hodgkin lymphoma                                        | 14 (10.7%)                                  | 1 (6.25%)                       | 1 (3.12%)                           |         |     |
| Mantle cell lymphoma                                    | 20 (15.3%)                                  | 0 (0.00%)                       | 2 (6.25%)                           |         |     |
| Other non-Hodgkin lymphoma                              | 2 (1.53%)                                   | 1 (6.25%)                       | 0 (0.00%)                           |         |     |
| Plasma cell dyscrasia                                   | 64 (48.9%)                                  | 5 (31.2%)                       | 15 (46.9%)                          |         |     |
| T-cell lymphoma                                         | 4 (3.05%)                                   | 0 (0.00%)                       | 2 (6.25%)                           |         |     |
| <b>Remission status at time of mobilisation - n (%)</b> |                                             |                                 |                                     |         | 179 |
| CR                                                      | 52 (40%)                                    | 6 (38%)                         | 12 (38%)                            |         |     |
| PR or VGPR                                              | 72 (55%)                                    | 9 (56%)                         | 15 (47%)                            |         |     |
| Stable or progressive disease                           | 7 (5%)                                      | 1 (6%)                          | 5 (16%)                             |         |     |
| <b>Bone marrow infiltration – n*</b>                    | 5                                           | 1                               | 1                                   |         | 43  |
| <b>CD34 yield (10<sup>6</sup>/kg) - median [IQR]</b>    | 8.20 [5.44;11.5]                            | 4.26 [2.15;7.58]                | 9.69 [6.10;11.6]                    | 0.007   | 157 |
| <b>Number of apheresis days - median [IQR]</b>          | 2.00 [1.00;2.50]                            | 2.00 [1.00;2.00]                | 2.00 [1.00;2.00]                    | 0.705   | 179 |
| <b>Allogeneic transplantation - n (%)</b>               | 17 (13.0%)                                  | 2 (12.5%)                       | 4 (12.5%)                           | 1.000   | 179 |
| <b>Peripheral blood counts* - mean (SD)</b>             |                                             |                                 |                                     |         |     |
| Hemoglobin level (g/dL)                                 | 11.9 (1.62)                                 | 10.8 (1.44)                     | 11.8 (1.80)                         | 0.047   | 179 |
| Platelet count (x 10 <sup>9</sup> /L)                   | 263 (108)                                   | 208 (78.8)                      | 250 (98.9)                          | 0.129   | 179 |
| WBC (x 10 <sup>9</sup> /L)                              | 6.32 (3.12)                                 | 5.91 (3.59)                     | 7.19 (4.13)                         | 0.345   | 179 |
| ANC (x 10 <sup>9</sup> /L)                              | 3.80 (2.08)                                 | 2.71 (1.74)                     | 4.75 (2.79)                         | 0.048   | 112 |

Data are presented as mean (SD), median [IQR] or n (%), as appropriate. ANC: absolute neutrophil count; CR: complete remission; IQR: interquartile range; PR: partial remission; SD: standard deviation; VGPR: very good partial response; WBC: white blood cell count. \*Peripheral blood levels were recorded before start of the chemomobilisation regimen. \*For lymphoma patients with stable or progressive disease or partial remission.

**Supplementary Figure 1. Coverage across all samples in the sequenced cohort of poor mobilizers and controls (n=179).**

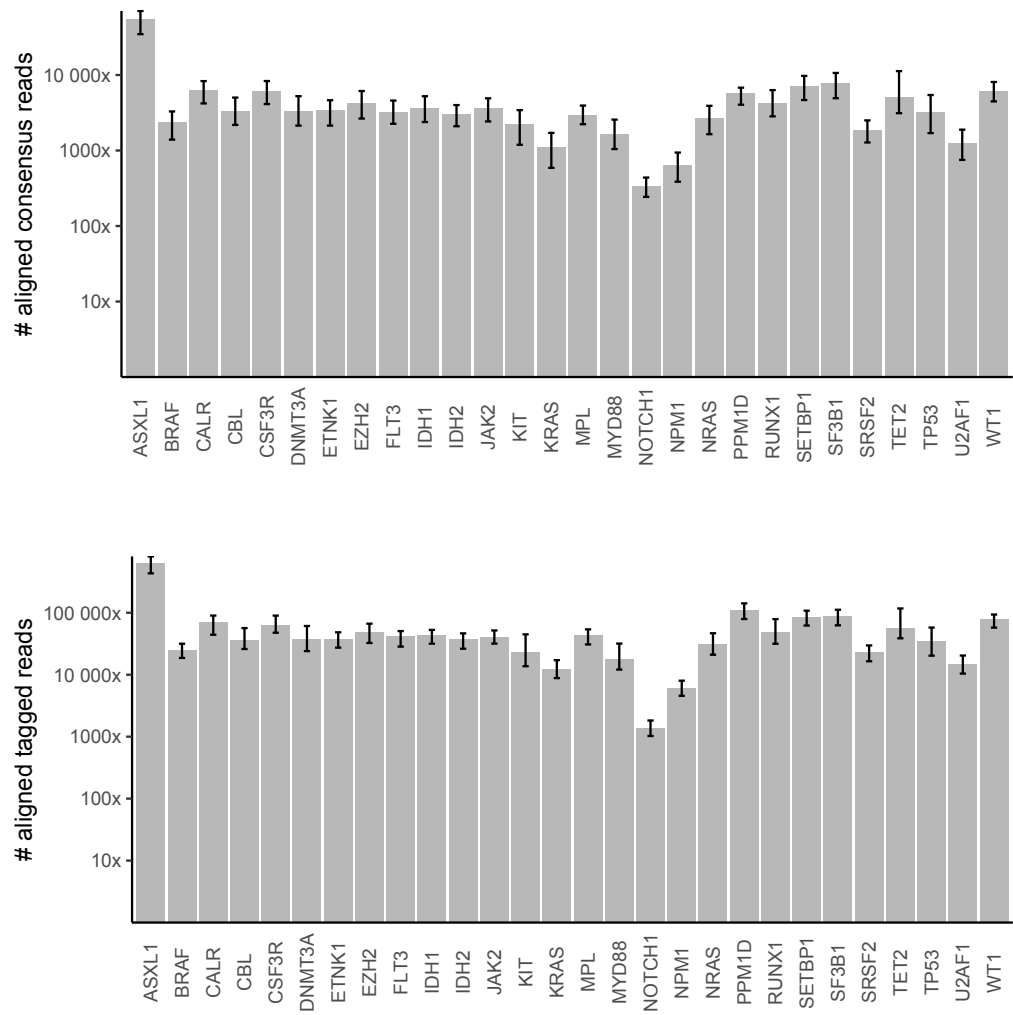

Supplementary Figure 2. Time differences between (planned) date of apheresis and DNA sample collection.

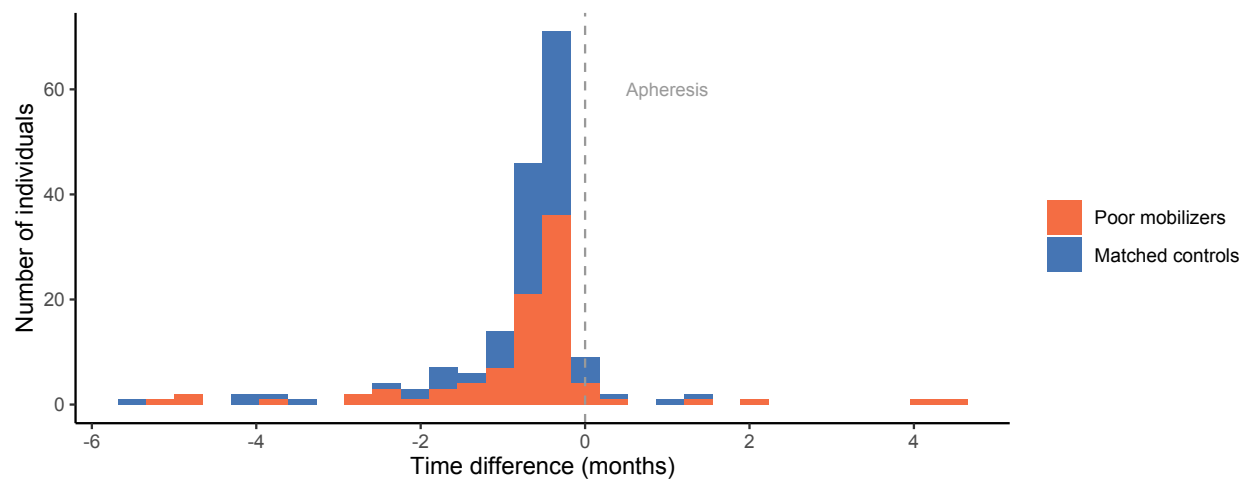

### Supplementary Figure 3. Spectrum of CHIP (VAF $\geq 2\%$ ) detected in poor mobilizers and controls

To compare with recent literature, we additionally performed analyses restricting our variant calls to mutations with VAF  $\geq 2\%$ , corresponding to proposed definition of “clonal hematopoiesis of indeterminate potential” (CHIP)<sup>1</sup>. A total of 51 mutations in 34 individuals (16 poor mobilizers and 18 matched controls) were detected  $\geq 2\%$  VAF. A) Prevalence of CHIP in 90 poor mobilizers and 89 matched controls. B) Distribution in highest variant allele frequency (VAF) for poor mobilizers (orange) and matched controls (blue) carrying CHIP. Boxplots indicate median, first and third quartiles, with whiskers extending to 1.5x interquartile range. C) Violin plot displaying the distribution in number of detected mutations in poor mobilizers (orange) and controls (blue) carrying CHIP.

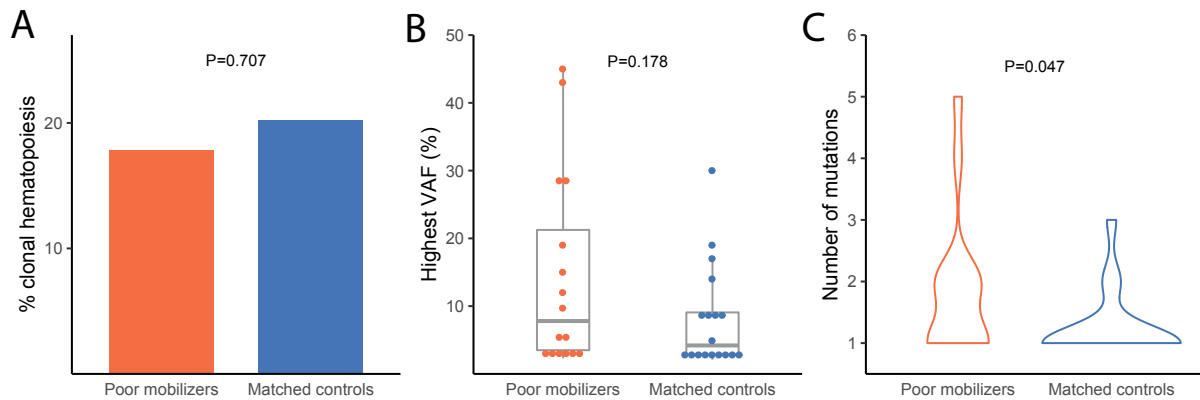

1. Steensma DP, Bejar R, Jaiswal S et al. Clonal hematopoiesis of indeterminate potential and its distinction from myelodysplastic syndromes. *Blood*. 2015;126(1):9-16.

**Supplementary Figure 4. CD34 yield for controls and failure subgroups.**

Controls and failure subgroups 1, 2 and 3 are shown. Leukapheresis was not initiated in 14 respectively 11 individuals from failure subgroups 1 and 2 based on the expected CD34+ collection yield. These data are missing from the analysis.

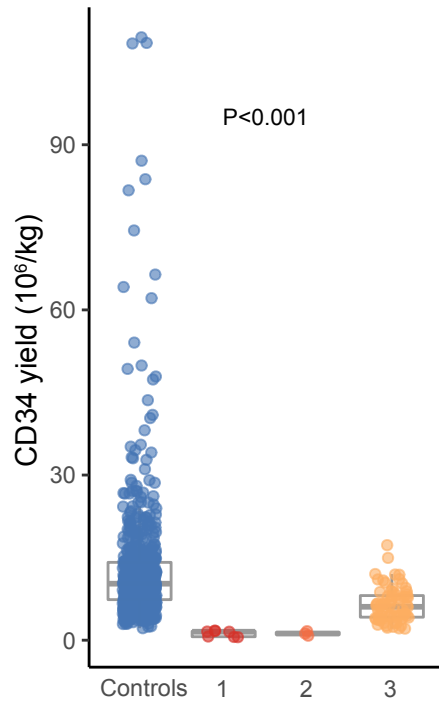

Supplementary Figure 5. CD34 yield for individuals with and without subsequent development of t-MN.

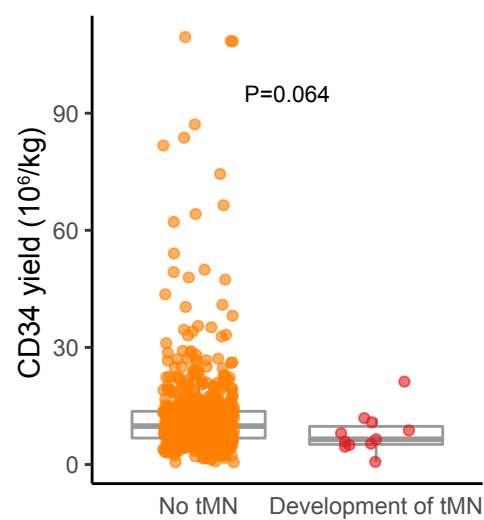

**Supplementary Figure 6. Cumulative incidence of t-MN development with allogeneic transplant and death as competing risk.**

Cumulative incidence curves were constructed using the Aalen-Johansen estimator, with death and allogeneic transplant as the competing risk. P-values from Gray's test were reported.

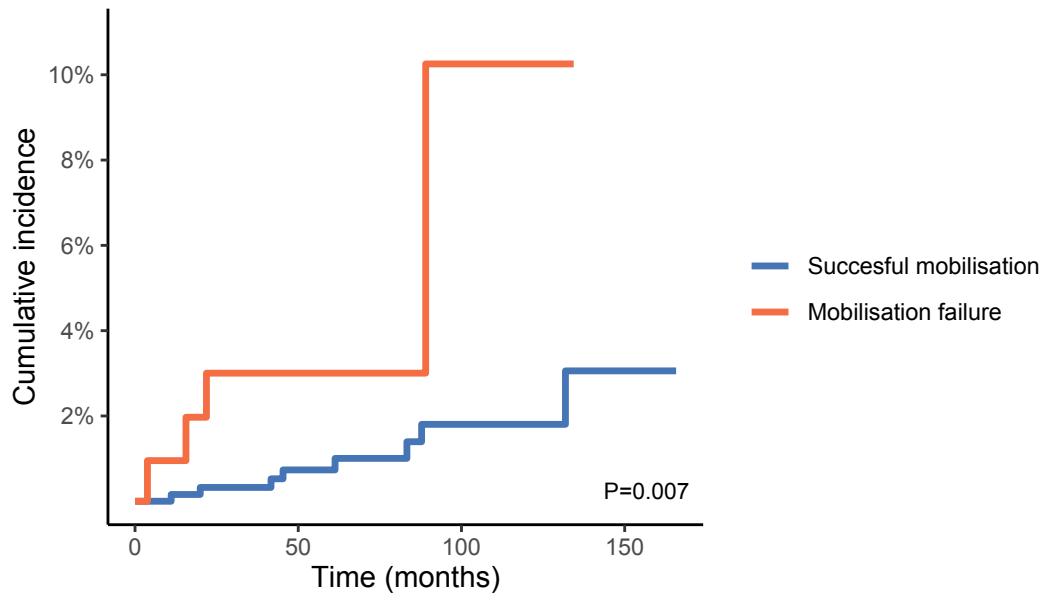

Supplementary Figure 7. Overall survival for three groups of mobilization failure and controls.

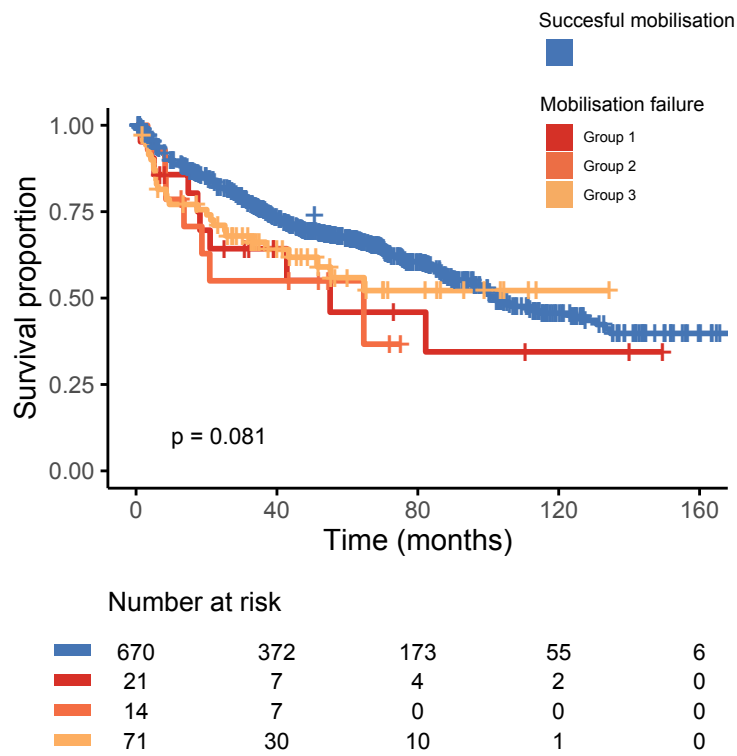

Supplement: BLOODA_ADV-2022-007497-mmc1.pdf [file BLOODA_ADV-2022-007497-mmc1.pdf]
